# Supplementary material for: New insights into the standard method of assessing bacterial filtration efficiency of medical face masks
Source: PubMed Central journal article supplement (PMC7960701; doi:10.1038/s41598-021-85327-x), 2021-03-15
Supplement: 41598_2021_85327_MOESM1_ESM.pdf [file 41598_2021_85327_MOESM1_ESM.pdf]

Supplementary file

**Performances of medical face masks: new insights into the standard method  
of assessing bacterial filtration efficiency**

POURCHEZ Jérémie<sup>1</sup>, PEYRON Aurélien<sup>1</sup>, MONTIGAUD Yoann<sup>1</sup>, LAURENT Coralie<sup>1</sup>, AUDOUX Estelle<sup>2</sup>,  
LECLERC Lara<sup>1</sup>, VERHOEVEN Paul O<sup>2,3</sup>

**Supplementary Table 1.** Positive-hole conversion table from the instruction manual of the six-stage viable ACI.

r, positive-hole count; P, corresponding corrected viable particle count.

| <i>r</i> | <i>P</i> | <i>r</i> | <i>P</i> | <i>r</i> | <i>P</i> | <i>r</i> | <i>P</i> | <i>r</i> | <i>P</i> | <i>r</i> | <i>P</i> | <i>r</i> | <i>P</i> | <i>r</i> | <i>P</i> | <i>r</i> | <i>P</i> | <i>r</i> | <i>P</i> |
|----------|----------|----------|----------|----------|----------|----------|----------|----------|----------|----------|----------|----------|----------|----------|----------|----------|----------|----------|----------|
| 1        | 1        | 41       | 43       | 81       | 91       | 121      | 144      | 161      | 206      | 201      | 279      | 241      | 369      | 281      | 485      | 321      | 649      | 361      | 931      |
| 2        | 2        | 42       | 44       | 82       | 92       | 122      | 146      | 162      | 208      | 202      | 281      | 242      | 372      | 282      | 488      | 322      | 654      | 362      | 942      |
| 3        | 3        | 43       | 45       | 83       | 93       | 123      | 147      | 163      | 208      | 203      | 283      | 243      | 374      | 283      | 492      | 323      | 659      | 363      | 952      |
| 4        | 4        | 44       | 47       | 84       | 94       | 124      | 148      | 164      | 211      | 204      | 285      | 244      | 377      | 284      | 495      | 324      | 664      | 364      | 963      |
| 5        | 5        | 45       | 48       | 85       | 96       | 125      | 150      | 165      | 213      | 205      | 287      | 245      | 379      | 285      | 499      | 325      | 670      | 365      | 974      |
| 6        | 6        | 46       | 49       | 86       | 97       | 126      | 151      | 166      | 214      | 206      | 289      | 246      | 382      | 286      | 502      | 326      | 675      | 366      | 986      |
| 7        | 7        | 47       | 50       | 87       | 98       | 127      | 153      | 167      | 216      | 207      | 292      | 247      | 384      | 287      | 506      | 327      | 680      | 367      | 998      |
| 8        | 8        | 48       | 51       | 88       | 99       | 128      | 154      | 168      | 218      | 208      | 294      | 248      | 387      | 288      | 508      | 328      | 686      | 368      | 1010     |
| 9        | 9        | 49       | 52       | 89       | 101      | 129      | 156      | 169      | 220      | 209      | 296      | 249      | 390      | 289      | 513      | 329      | 692      | 369      | 1023     |
| 10       | 10       | 50       | 53       | 90       | 102      | 130      | 157      | 170      | 221      | 210      | 298      | 250      | 392      | 290      | 516      | 330      | 697      | 370      | 1036     |
| 11       | 11       | 51       | 55       | 91       | 103      | 131      | 159      | 171      | 223      | 211      | 300      | 251      | 395      | 291      | 520      | 331      | 703      | 371      | 1050     |
| 12       | 12       | 52       | 56       | 92       | 105      | 132      | 160      | 172      | 225      | 212      | 302      | 252      | 398      | 292      | 524      | 332      | 709      | 372      | 1064     |
| 13       | 13       | 53       | 57       | 93       | 106      | 133      | 162      | 173      | 227      | 213      | 304      | 253      | 400      | 293      | 527      | 333      | 715      | 373      | 1078     |
| 14       | 14       | 54       | 58       | 94       | 107      | 134      | 163      | 174      | 228      | 214      | 306      | 254      | 403      | 294      | 531      | 334      | 721      | 374      | 1093     |
| 15       | 15       | 55       | 59       | 95       | 108      | 135      | 165      | 175      | 230      | 215      | 308      | 255      | 406      | 295      | 535      | 335      | 727      | 375      | 1109     |
| 16       | 16       | 56       | 60       | 96       | 110      | 136      | 166      | 176      | 232      | 216      | 311      | 256      | 409      | 296      | 539      | 336      | 733      | 376      | 1125     |
| 17       | 17       | 57       | 61       | 97       | 111      | 137      | 168      | 177      | 234      | 217      | 313      | 257      | 411      | 297      | 543      | 337      | 739      | 377      | 1142     |
| 18       | 18       | 58       | 63       | 98       | 112      | 138      | 169      | 178      | 236      | 218      | 315      | 258      | 414      | 298      | 547      | 338      | 746      | 378      | 1160     |
| 19       | 19       | 59       | 64       | 99       | 114      | 139      | 171      | 179      | 237      | 219      | 317      | 259      | 417      | 299      | 551      | 339      | 752      | 379      | 1179     |
| 20       | 20       | 60       | 65       | 100      | 115      | 140      | 172      | 180      | 239      | 220      | 319      | 260      | 420      | 300      | 555      | 340      | 759      | 380      | 1198     |
| 21       | 22       | 61       | 66       | 101      | 116      | 141      | 174      | 181      | 241      | 221      | 322      | 261      | 423      | 301      | 559      | 341      | 766      | 381      | 1219     |
| 22       | 23       | 62       | 67       | 102      | 118      | 142      | 175      | 182      | 243      | 222      | 324      | 262      | 426      | 302      | 563      | 342      | 772      | 382      | 1241     |
| 23       | 24       | 63       | 69       | 103      | 119      | 143      | 177      | 183      | 245      | 223      | 326      | 263      | 429      | 303      | 567      | 343      | 779      | 383      | 1263     |
| 24       | 25       | 64       | 70       | 104      | 120      | 144      | 179      | 184      | 246      | 224      | 328      | 264      | 432      | 304      | 571      | 344      | 786      | 384      | 1288     |
| 25       | 26       | 65       | 71       | 105      | 122      | 145      | 180      | 185      | 248      | 225      | 231      | 265      | 434      | 305      | 575      | 345      | 793      | 385      | 1314     |
| 26       | 27       | 66       | 72       | 106      | 123      | 146      | 182      | 186      | 250      | 226      | 333      | 266      | 437      | 306      | 579      | 346      | 801      | 386      | 1341     |
| 27       | 28       | 67       | 73       | 107      | 125      | 147      | 183      | 187      | 252      | 227      | 335      | 267      | 440      | 307      | 584      | 347      | 808      | 387      | 1371     |
| 28       | 29       | 68       | 75       | 108      | 126      | 148      | 185      | 188      | 254      | 228      | 338      | 268      | 443      | 308      | 588      | 348      | 816      | 388      | 1403     |
| 29       | 30       | 69       | 76       | 109      | 127      | 149      | 186      | 189      | 256      | 229      | 340      | 269      | 447      | 309      | 592      | 349      | 824      | 389      | 1438     |
| 30       | 31       | 70       | 77       | 110      | 129      | 150      | 188      | 190      | 258      | 230      | 342      | 270      | 450      | 310      | 597      | 350      | 832      | 390      | 1476     |
| 31       | 32       | 71       | 78       | 111      | 130      | 151      | 190      | 191      | 260      | 231      | 345      | 271      | 453      | 311      | 601      | 351      | 840      | 391      | 1518     |
| 32       | 33       | 72       | 79       | 112      | 131      | 152      | 191      | 192      | 262      | 232      | 347      | 272      | 456      | 312      | 606      | 352      | 848      | 392      | 1565     |
| 33       | 34       | 73       | 81       | 113      | 133      | 153      | 193      | 193      | 263      | 233      | 349      | 273      | 459      | 313      | 610      | 353      | 857      | 393      | 1619     |
| 34       | 36       | 74       | 82       | 114      | 134      | 154      | 194      | 194      | 265      | 234      | 352      | 274      | 462      | 314      | 615      | 354      | 865      | 394      | 1681     |
| 35       | 37       | 75       | 83       | 115      | 136      | 155      | 196      | 195      | 267      | 235      | 354      | 275      | 465      | 315      | 620      | 355      | 874      | 395      | 1754     |
| 36       | 38       | 76       | 84       | 116      | 137      | 156      | 198      | 196      | 269      | 236      | 357      | 276      | 468      | 316      | 624      | 356      | 883      | 396      | 1844     |
| 37       | 39       | 77       | 86       | 117      | 138      | 157      | 199      | 197      | 271      | 237      | 359      | 277      | 472      | 317      | 629      | 357      | 892      | 397      | 1961     |
| 38       | 40       | 78       | 87       | 118      | 140      | 158      | 201      | 198      | 273      | 238      | 362      | 278      | 475      | 318      | 634      | 358      | 902      | 398      | 2127     |
| 39       | 41       | 79       | 88       | 119      | 141      | 159      | 203      | 199      | 275      | 239      | 364      | 279      | 478      | 319      | 639      | 359      | 911      | 399      | 2427     |
| 40       | 42       | 80       | 89       | 120      | 143      | 160      | 204      | 200      | 277      | 240      | 367      | 280      | 482      | 320      | 644      | 360      | 921      | 400      | *        |

**Supplementary Table 2.** Data for comparing the bacterial counting methods corresponding to Figures 5, 6, 7 and 8.

|                                            |           | 90-mm Petri dish |                 |                 | 100-mm Petri dish |                 |                 |
|--------------------------------------------|-----------|------------------|-----------------|-----------------|-------------------|-----------------|-----------------|
|                                            |           | Method 1         | Method 2        | Method 3        | Method 1          | Method 2        | Method 3        |
| Aerosol size ( $\mu\text{m}$ )             | MPS (n=4) | 3.70 $\pm$ 0.22  | 3.10 $\pm$ 0.08 | 3.31 $\pm$ 0.16 | 4.06 $\pm$ 0.13   | 3.04 $\pm$ 0.13 | 3.87 $\pm$ 0.10 |
|                                            | MAD (n=4) | 4.04 $\pm$ 0.16  | 3.60 $\pm$ 0.22 | 3.55 $\pm$ 0.08 | 4.23 $\pm$ 0.15   | 3.29 $\pm$ 0.18 | 3.87 $\pm$ 0.10 |
| GSD of the aerosol size distribution (n=4) |           | 1.88 $\pm$ 0.07  | 1.38 $\pm$ 0.02 | 1.89 $\pm$ 0.92 | 2.12 $\pm$ 0.15   | 1.57 $\pm$ 0.14 | 2.22 $\pm$ 0.20 |
| Colonies counted (CFUs; n=8)               |           | 2111 $\pm$ 310   | 5299 $\pm$ 916  | 2351 $\pm$ 377  | 2781 $\pm$ 460    | 7659 $\pm$ 1177 | 2638 $\pm$ 480  |
